# Supplementary material
Source: publisher site journal article supplement (https://www.dovepress.com/article/215717)
Supplement: Supplementary file 1 [file get_supplementary_file.php]

**Supplementary Data**

**
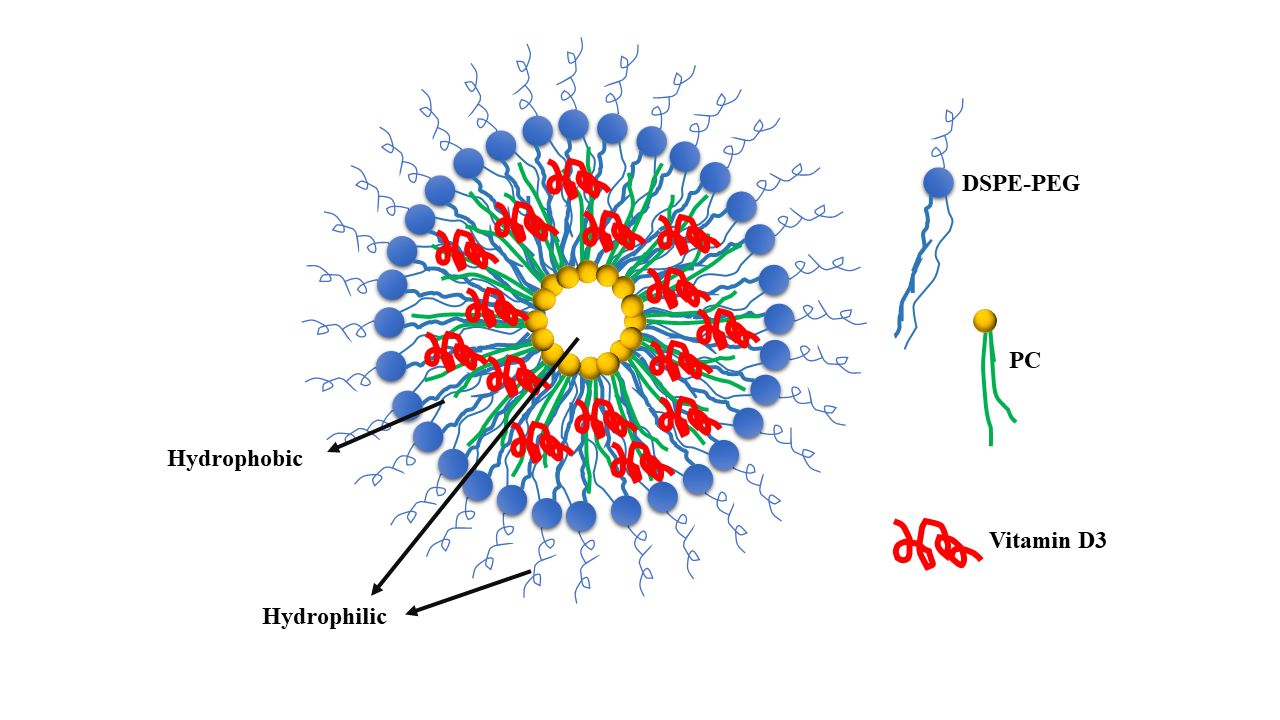
**

**Supplementary Figure 1. Schematic diagram of vitamin D nanoparticle delivery system.** The liposome-based nanoparticles constructed from vitamin D3, L-a-phosphatidylcholine (PC), and 1,2-Distearoyl-sn-glycero-3-phosphoethanolamine-N-[amino-(polyethylene glycol)2000] (DSPE-PEG) at a 5 :10 :1 weight ratio.

| **A**  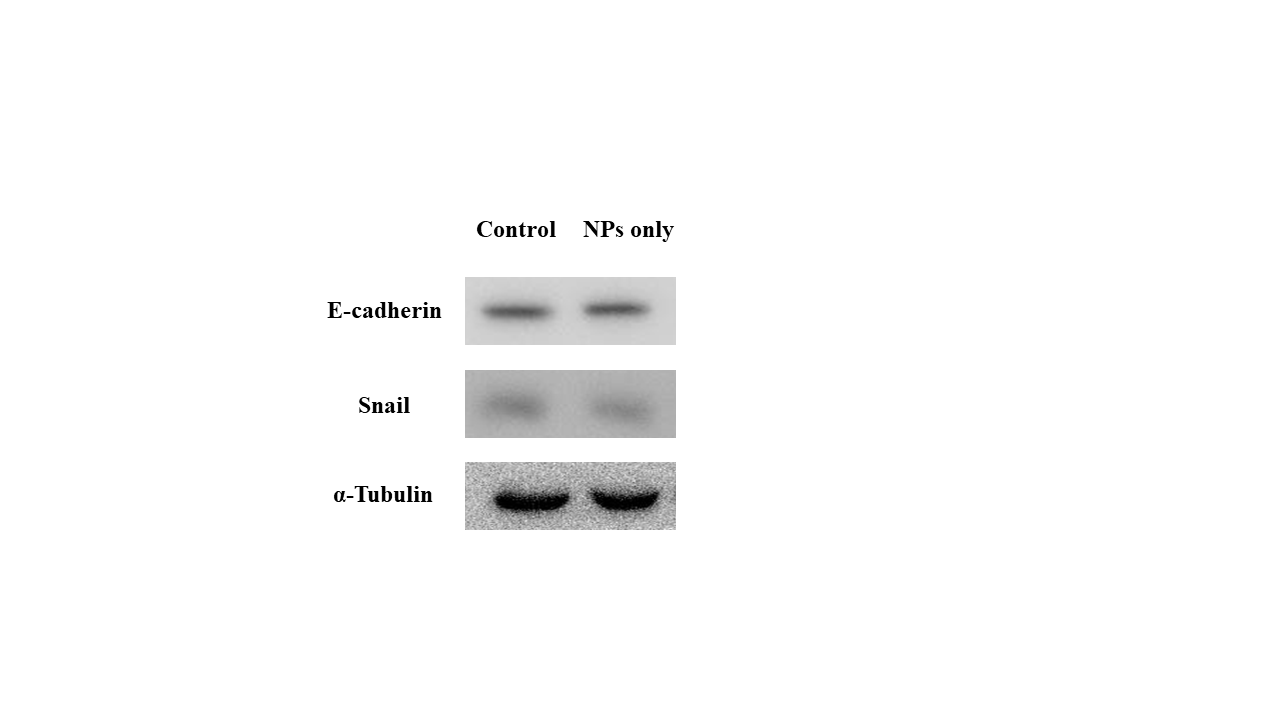 |
| --- |
| **B**  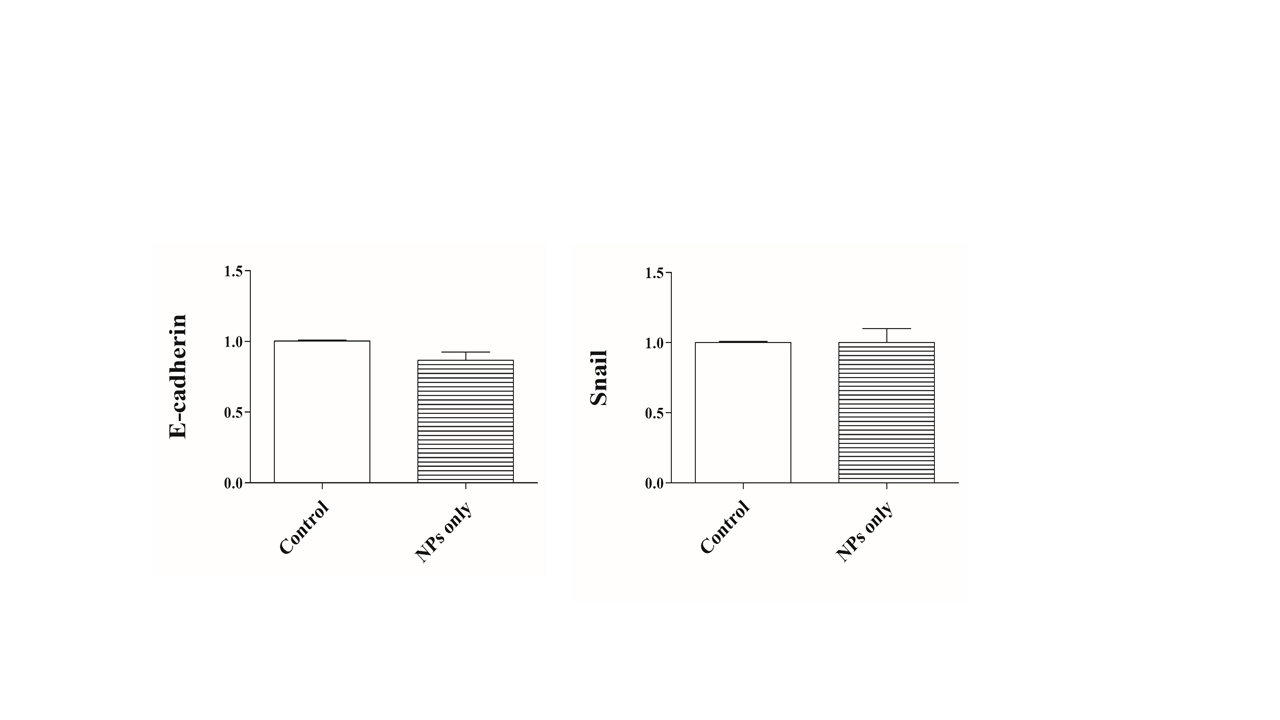 |

**Supplementary Figure 2. Control nanoliposomes do not attenuate transforming growth factor** 𝛽 **(TGF-** 𝛽**）effect *in vitro*.** (A) The western blot analysis showed that nanoliposomes (NPs only) didn’t induced EMT process of MCs. (B) Normalized data of protein levels of E-cadherin and Snail (mean ± SD, n=3).
